# Supplementary material for: Micro-shear bond strength of different calcium silicate materials to bulk-fill composite
Source: PeerJ. 2023 Mar 29;11:e15183. doi: 10.7717/peerj.15183 (PMC10066686; doi:10.7717/peerj.15183)
Supplement: Supplemental Information 1 [file peerj-11-15183-s001.xlsx]

## Sheet: Sayfa1
TheraCal LC	TheraCal PT	NeoMTA 2	Biodentin	BioMTA+
SBS (Mpa )
11.71	26.5	3.64	7.91	2.84
14.59	31.72	11.44	20.6	7.27
15.21	34.21	8.3	24.6	6.82
19.77	27.59	16.05	16.19	6.95
17.22	21.7	9.6	5.77	7.44
16.09	24.72	9.41	7.36	8.48
30.29	40.18	9.65	23.34	8.4
23.31	36.73	22.07	18.67	7.37
27.105	23.14	18.81	7.39	4.98
26.99	32.56	5.9	20.5	3.97
